# Supplementary material
Source: Springer Nature journal article supplement (https://www.springermedizin.de/resource/supplementary/13054_2010_9315_MOESM4_ESM.pdf/9705932)

**A** ICU survival: admission + day 3 + day 7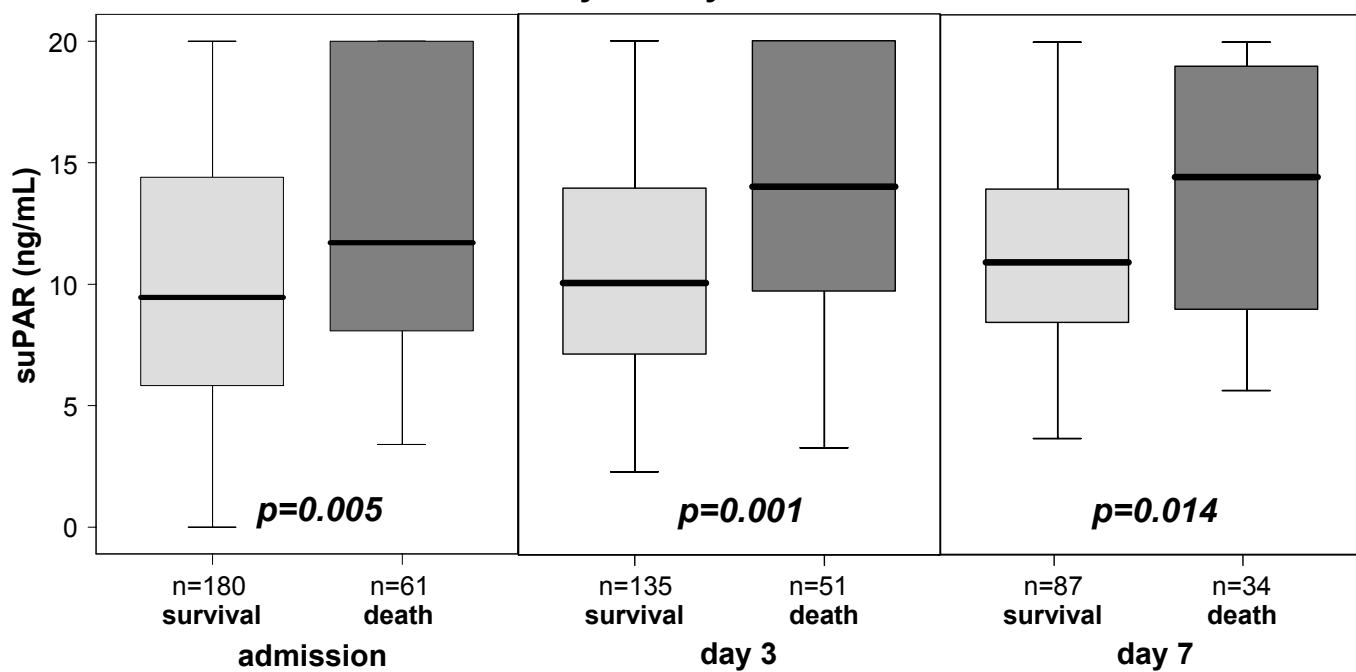**B** ICU survival: admission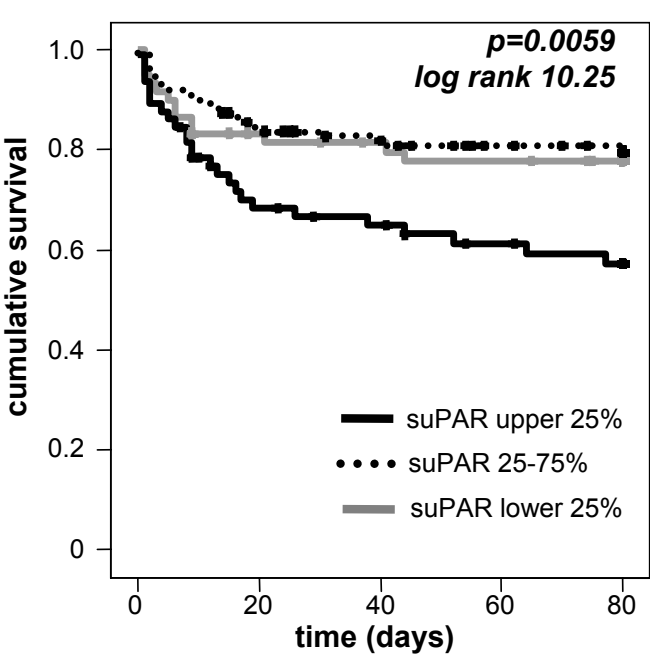**C** ICU survival: day 3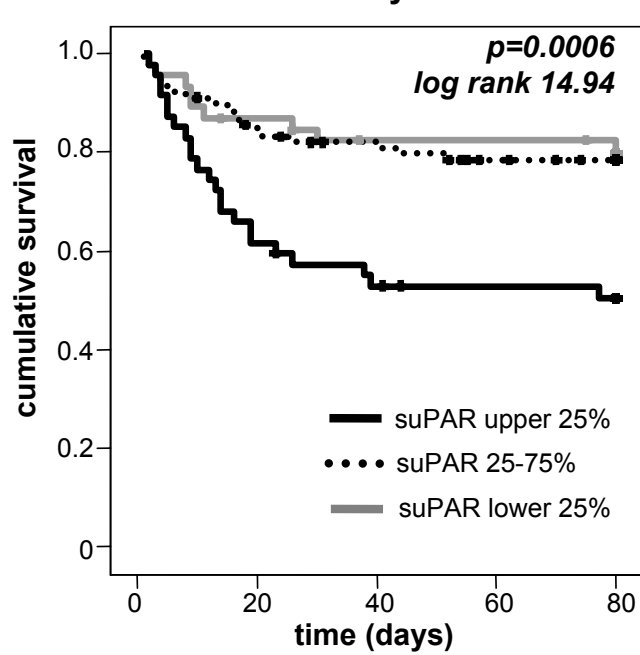**D** ICU survival: admission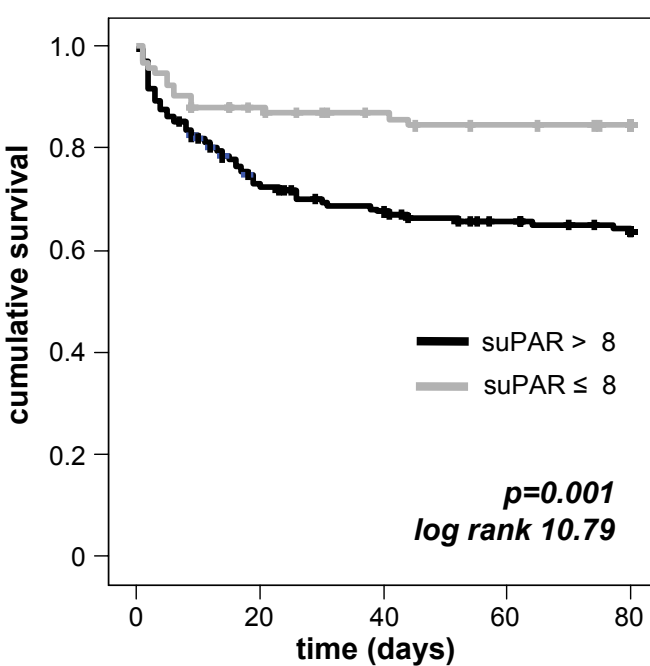**E** ICU survival: day 3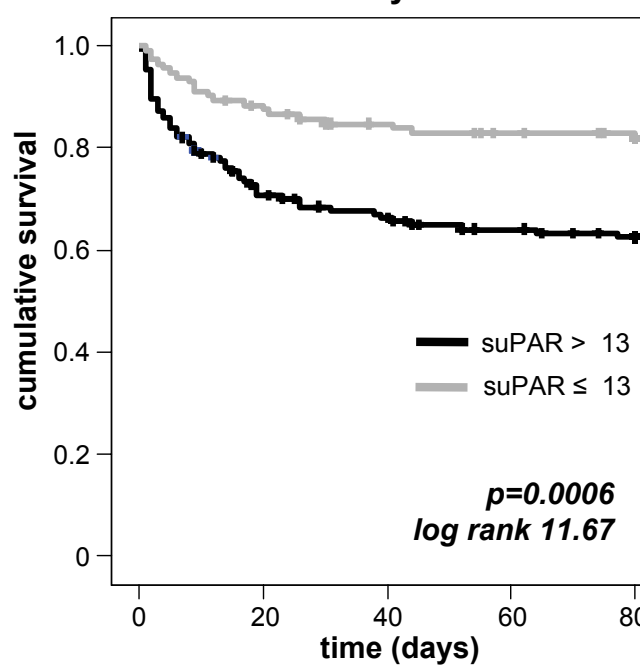

Supplement: MOESM4 [file 9705932]
